# Supplementary material for: Pesticide Residues and Metabolites in Greek Honey and Pollen: Bees and Human Health Risk Assessment
Source: MDPI journal article supplement (doi:10.3390/foods12040706), 2023-02-06
Supplement: s1 [file s1]

## **SUPPLEMENTARY DATA to the paper entitled:**

### **Pesticide Residues and Metabolites in Greek Honey and Pollen: Bees and Human Health Risk Assessment**

Konstantinos M. Kasiotis,\* Effrosyni Zafeiraki, Electra Manea-Karga, Pelagia Anastasiadou and Kyriaki Machera

Benaki Phytopathological Institute, Laboratory of Pesticides' Toxicology, 8 St. Delta Street, Athens, Kifissia 14561, Greece

To whom correspondence should be addressed. E-mail: k.kasiotis@bpi.gr

This document provides more detailed information to the main paper mentioned above. The following information includes:

| <b>Content</b> |                                                                                                                                    | <b>Page</b> |
|----------------|------------------------------------------------------------------------------------------------------------------------------------|-------------|
| Text           | Chromatographic and mass spectrometric conditions                                                                                  | S1          |
| Table S1       | Active substances and LOQs (pollen and honey)                                                                                      | S2          |
| Table S2       | Risk calculations for bumble bees based on the active substances (mean and maximum concentrations) quantified in pollen samples    | S3          |
| Table S3       | Risk calculations for solitary bees based on the active substances (mean and maximum concentrations) quantified in pollen samples. | S4          |

#### **Text**

##### **Chromatographic and mass spectrometric conditions**

###### **LC-ESI-MS/MS**

For the determination of pesticide residues in honey and pollen samples an LC-ESI-MS/MS was used, as described in detail in preceding publications of our group (Kasiotis et al., 2018, 2021; Zafeiraki et al., 2022). Briefly, using a typical C18 column, the chromatographic gradient started from 80% 5 mM ammonium formate in H<sub>2</sub>O, 0.1% formic acid (mobile phase channel A) to 100% 5 mM ammonium formate in MeOH, 0.1% formic acid (mobile phase channel B) in 30 min. Each chromatographic separation lasted 35 min and the injection volume was 20 µL. Furthermore, the flow rate was set at 0.3 mL/min, while the analytical column was thermostated at 30 °C. The analyses were performed with a multiple reaction monitoring (MRM) method monitoring two mass transitions for every analyte.

###### **GC-MS/MS**

The GC-MS/MS analysis of the samples was performed on a Chromtech Evolution 3 MS/MS triple quadrupole mass spectrometer built on an Agilent 5975 B inert XL EI/CI MSD system. The chromatography system was equipped with a Gerstel MPS-2 autosampler and a HP-5ms UI column (length 30m, ID 0.25mm, film thickness 0.25 µm, J&W Folsom, USA). For the separation of the analytes, the followed chromatographic gradient was applied: initial oven temperature of 50 °C for 1min, increase of temperature till 125 °C at a rate of 25 °C/min and finally reaching 300 °C at a rate of 10 °C/min. The analyses in MS/MS were performed with a multiple reaction monitoring (MRM) method that monitored two mass transitions (parent ion/product ion) for every analyte, while Argon 99.9999% was used as a collision gas. The electron multiplier voltage was set at 2000 V and the duration of MS/MS measurement was 36.5 min for each sample.

**Table S1: Active substances and LOQs (pollen and honey)**

| Analyte                    | LOQ<br>ng/g | Analyte              | LOQ<br>ng/g | Analyte                 | LOQ<br>ng/g |
|----------------------------|-------------|----------------------|-------------|-------------------------|-------------|
| Acetamiprid                | 1           | EPN                  | 10          | Penconazole             | 5           |
| Aclonifen                  | 10          | Ethion               | 10          | Pencycuron              | 10          |
| Alachlor                   | 0.5         | Ethoprophos          | 0.5         | Pendimethalin           | 10          |
| Aldicarb sulfone           | 5           | Famoxadone           | 0.5         | Phosalone               | 5           |
| Ametryn                    | 0.5         | Fenamidone           | 5           | Phosmet                 | 1           |
| Atrazine                   | 10          | Fenamiphos           | 5           | Phosphamidine           | 5           |
| Azimsulfuron               | 1           | Fenamiphos sulfone   | 1           | Phoxim                  | 5           |
| Azoxystrobin               | 0.5         | Fenamiphos sulfoxide | 1           | Piperonyl butoxide      | 5           |
| Benalaxyl                  | 5           | Fenbuconazole        | 1           | Pirimicarb              | 5           |
| Benfuracarb                | 1           | Fenpropathrin        | 10          | Pirimiphos-methyl       | 1           |
| Bensulfuron-methyl         | 1           | Fenpropimorph        | 10          | Prometryn               | 0.5         |
| Benfluralin                | 10          | Fenthion             | 10          | Propiconazole           | 5           |
| Boscalid                   | 5           | Fenthion-sulfone     | 10          | Prothioconazole desthio | 5           |
| Bupirimate                 | 5           | Fenthion-sulfoxide   | 1           | Pyraclostrobin          | 5           |
| Buprofezin                 | 5           | Flusilazole          | 1           | Pyrazophos              | 1           |
| Cadusafos                  | 1           | Fosthiazate          | 1           | Pyrimethanil            | 5           |
| Carbendazim                | 1           | Haloxypopethyl ester | 5           | Quinoxyfen              | 5           |
| Carbofuran                 | 1           | Imazalil             | 5           | Spinosad A              | 0.5         |
| Carboxin                   | 1           | Imidacloprid         | 1           | Spiroxamine             | 0.5         |
| Chlorpyrifos ethyl         | 5           | Indoxacarb           | 1           | Tebuconazole            | 5           |
| Chlorsulfuron              | 5           | Iprodione            | 5           | Tebufenozide            | 5           |
| Clethodim                  | 5           | Iprovalicarb         | 1           | Terbufos                | 5           |
| Clofentezine               | 5           | Isoproturon          | 1           | Terbuthylazine          | 5           |
| Clothianidin               | 1           | Linuron              | 0.5         | Tetraconazole           | 10          |
| Chloridazon                | 1           | Malaoxon             | 5           | Thiabendazole           | 1           |
| Cyproconazole 1            | 5           | Malathion            | 5           | Thiacloprid             | 0.5         |
| Cyproconazole 2            | 5           | Mepanipyrim          | 5           | Thiamethoxam            | 0.5         |
| Cyprodinil                 | 5           | Metalaxyl            | 0.5         | Thifensulfuron-methyl   | 5           |
| Demeton-S-methyl           | 0.5         | Metconazole          | 0.5         | Thiodicarb              | 1           |
| Demeton-S-methyl sulfoxide | 5           | Methidathion         | 1           | Triazophos              | 1           |
| Desmetryn                  | 1           | Methoxyfenozide      | 0.5         | Tricyclazole            | 1           |
| Diazinon                   | 10          | Metoxuron            | 5           | Trifloxystrobin         | 1           |
| Diethofencarb              | 5           | Metribuzin           | 1           | Triticonazole           | 10          |
| Difenoconazole             | 1           | Monocrotophos        | 0.5         | Triadimefon             | 10          |
| Dimethoate                 | 1           | Monolinuron          | 1           | Zoxamide                | 5           |
| Dimethomorph               | 5           | Myclobutanil         | 5           | Coumaphos               | 1           |
| Disulfoton                 | 5           | Nicosulfuron         | 1           | Cexaconazole            | 10          |
| Disulfoton sulfoxide       | 10          | Omethoate            | 1           | Cenazaquin              | 10          |
| Dodemorph                  | 1           | Oxadiazon            | 1           | Propargite              | 5           |
| Etoxazole                  | 1           | Paraoxon-methyl      | 10          | Methomyl                | 10          |
| Propamocarb                | 5           | Fludioxonil          | 5           | Amitraz                 | 5           |
| Napropamide                | 1           | DMF                  | 5           | DMPF                    | 5           |
| DMA                        | 10          | Etofenprox           | 1           | Cypermethrin            | 5           |
| Deltamethrin               | 5           | Coumaphos oxon       | 5           | Chlorpyrifos oxon       | 5           |

|              |   |             |   |  |  |
|--------------|---|-------------|---|--|--|
| Hexaconazole | 1 | Acrinathrin | 5 |  |  |
|--------------|---|-------------|---|--|--|

**Table S2.** Risk calculations for bumble bees based on the active substances (mean and maximum concentrations) quantified in pollen samples<sup>a</sup>.

|                    |                         |                            | Oral        |                | Contact     |                |
|--------------------|-------------------------|----------------------------|-------------|----------------|-------------|----------------|
| Active substance   | LD50 (oral, µg per bee) | LD50 (contact, µg per bee) | RISK (mean) | RISK (maximum) | RISK (mean) | RISK (maximum) |
| Clothianidin       | na                      | 0.02                       | -           | -              | 0.0094      | 4.52E-06       |
| Chlorpyrifos ethyl | 0.23                    | 1.58                       | 2.01E-04    | 3.46E-04       | 2.93E-05    | 2.74E-12       |
| tau-Fluvalinate    | 31.3                    | na                         | 5.34E-06    | 1.06E-05       | -           | -              |
| Dimethoate         | 0.33                    | 0.94                       | 4.88E-04    | 9.41E-04       | 1.71E-04    | 3.96E-11       |
| Cypermethrin       | 0.263                   | 0.119                      | 2.91E-05    | 3.33E-05       | 6.43E-05    | 1.18E-12       |
| Cyfluthrin         | 0.11                    | 0.36                       | 7.81E-05    | 1.19E-04       | 2.39E-05    | 8.72E-14       |
| Imidacloprid       | 0.038                   | 0.218                      | 1.59E-04    | 1.34E-04       | 2.76E-05    | 1.34E-04       |
| Acetamiprid        | 22.2                    | 100                        | 4.49E-08    | 7.36E-09       | 9.98E-09    | 7.36E-09       |
| Pyraclostrobin     | 97.2                    | 100                        | 7.45E-08    | 3.86E-07       | 7.24E-08    | 3.86E-07       |
| Permethrin         | na                      | 0.22                       | -           | -              | 6.89E-05    | 8.47E-04       |
| λ-Cyhalothrin      | 0.16                    | 0.11                       | 1.66E-05    | 1.43E-04       | 2.42E-05    | 1.43E-04       |
| Thiacloprid        | na                      | 100                        | -           | -              | 6.35E-07    | 8.96E-05       |
| Dimethomorph       | 283.2                   | 300                        | 1.98E-08    | 2.33E-07       | 1.87E-08    | 2.33E-07       |
| Methomyl           | >3.3                    | na                         | 2.69E-05    | 3.46E-05       | -           | -              |

<sup>a</sup>pollen daily consumption 30.3 mg

**Table S3.** Risk calculations for solitary bees based on the active substances (mean and maximum concentrations) quantified in pollen samples<sup>a</sup>.

|                    |                         |                            | Oral          |                | Contact       |                |
|--------------------|-------------------------|----------------------------|---------------|----------------|---------------|----------------|
|                    | LD50 (oral, µg per bee) | LD50 (contact, µg per bee) | RISK (median) | RISK (maximum) | RISK (median) | RISK (maximum) |
| Clothianidin       | 8.4 <sup>1</sup>        | 0.1 <sup>1</sup>           | 7.53E-06      | 1.41E-05       | 6.33E-04      | 0.0012         |
| Chlorpyrifos ethyl | na                      | 4.19 <sup>1</sup>          | -             | -              | 3.71E-06      | 6.39E-06       |
| Dimethoate         | 0.25 <sup>2</sup>       | 1.02 <sup>2</sup>          | 2.17E-04      | 4.18E-04       | 5.31E-05      | 1.02E-04       |
| Propiconazole      | >33.3 <sup>2</sup>      | na                         | 2.37E-07      | 2.38E-07       | -             | -              |
| Imidacloprid       | na                      | 0.031 <sup>1</sup>         | -             | -              | 6.54E-05      | 9.47E-05       |
| Acetamiprid        | na                      | 1.72 <sup>1</sup>          | -             | -              | 1.95E-07      | 2.60E-07       |
| λ-Cyhalothrin      | na                      | 0.136 <sup>1</sup>         | -             | -              | 6.58E-06      | 6.58E-06       |
| Thiacloprid        | na                      | 1.16 <sup>1</sup>          | -             | -              | 1.84E-05      | 1.84E-05       |

<sup>a</sup>pollen daily consumption of 10.2 mg; <sup>1</sup>: Genus: *Osmia bicornis*, <sup>2</sup>: Genus: *Osmia lignaria*
